# Supplementary material
Source: Springer Nature journal article supplement (https://www.springermedizin.de/resource/supplementary/13024_2012_378_MOESM3_ESM.pdf/9643836)

**A**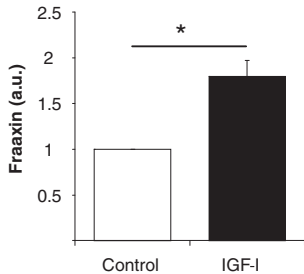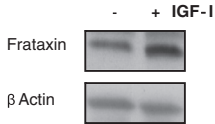**B**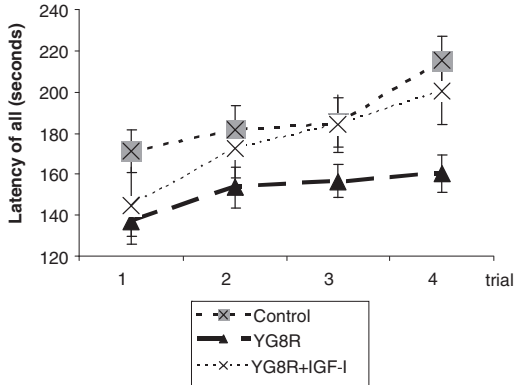

Supplement: MOESM3 [file 9643836]
